# Supplementary material for: Associations between urban greenspace and health-related quality of life in children
Source: PubMed Central journal article supplement — Prev Med Rep. 2016 Feb 3;3:211–21. doi: 10.1016/j.pmedr.2016.01.013 (PMC4929180; doi:10.1016/j.pmedr.2016.01.013), 2016-02-03
Supplement: mmc1.pdf [file mmc1.pdf]

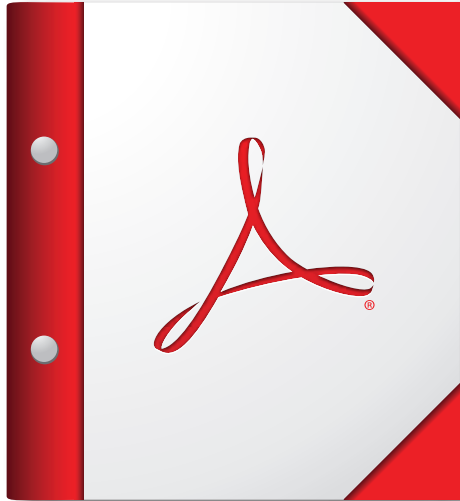

**For the best experience, open this PDF portfolio in  
Acrobat 9 or Adobe Reader 9, or later.**

[Get Adobe Reader Now!](#)
